# Supplementary material
Source: PubMed Central journal article supplement (PMC5854528)
Supplement: NIHMS939294-supplement-supplement_1.pdf [file NIHMS939294-supplement-supplement_1.pdf]

**Supplemental Table 1:** Demographic characteristics of HIV-positive Rakai Community Cohort Study (RCCS) participants from February 2015 and September 2016, by ART and viral suppression status

|                                                               | Initiated ART |      |          | Suppressed§ |      |          |
|---------------------------------------------------------------|---------------|------|----------|-------------|------|----------|
|                                                               | n/N           | %    | p-value‡ | n/N         | %    | p-value‡ |
| <b>Overall</b>                                                | 1076/1554     | 68.7 | -        | 1002/1076   | 93.1 | -        |
| <b>Female</b>                                                 | 781/1075      | 72.7 |          | 728/781     | 93.2 |          |
| <b>Male</b>                                                   | 295/479       | 61.7 | <0.001   | 274/295     | 93.2 | 1.0      |
| <b>Age, Yrs.</b>                                              |               |      |          |             |      |          |
| 15-24                                                         | 105/198       | 53.3 |          | 85/105      | 81.0 |          |
| 25-29                                                         | 155/270       | 57.4 |          | 143/155     | 92.3 |          |
| 30-39                                                         | 441/610       | 72.3 |          | 415/441     | 94.1 |          |
| 40+                                                           | 375/476       | 78.8 | <0.001   | 359/375     | 96.0 | <0.001   |
| <b>Marital status</b>                                         |               |      |          |             |      |          |
| Married                                                       | 596/879       | 67.8 |          | 555/596     | 93.3 |          |
| Previously Married                                            | 381/519       | 73.4 |          | 358/381     | 93.4 |          |
| Never Married                                                 | 99/155        | 63.9 | 0.022    | 89/99       | 89.9 | 0.362    |
| <b>Educational status</b>                                     |               |      |          |             |      |          |
| No education/Some primary                                     | 817/1167      | 70.1 |          | 760/817     | 93.1 |          |
| Post Primary                                                  | 259/387       | 66.9 | 0.253    | 242/259     | 93.4 | 1.0      |
| <b>Occupation</b>                                             |               |      |          |             |      |          |
| Non-high risk occupation                                      | 986/1407      | 70.1 |          | 917/986     | 93.1 |          |
| Bar/waitress/sex worker/Truck or motorcycle driver/Fisherfolk | 90/147        | 61.2 | 0.030    | 85/90       | 94.4 | 0.827    |
| <b>Distance from household to nearest ART facility (km)</b>   |               |      |          |             |      |          |
| <0.5                                                          | 87/126        | 69.0 |          | 84/87       | 96.6 |          |
| 0.5-2                                                         | 224/310       | 72.3 |          | 207/224     | 92.4 |          |
| 2-5                                                           | 481/688       | 70.0 |          | 440/481     | 91.7 |          |
| 5+                                                            | 284/430       | 66.0 | 0.319    | 271/284     | 95.4 | 0.121    |
| <b>Wealth Index</b>                                           |               |      |          |             |      |          |
| High wealth                                                   | 673/987       | 68.3 |          | 629/673     | 93.5 |          |
| Low wealth                                                    | 403/567       | 71.1 | 0.254    | 373/403     | 92.8 | 0.708    |
| <b>Vehicle ownership</b>                                      |               |      |          |             |      |          |
| None                                                          | 865/1255      | 69.0 |          | 806/865     | 93.2 |          |
| Car or Motorcycle                                             | 211/299       | 70.6 | 0.626    | 196/211     | 93.3 | 1.0      |
| <b>ART treatment facility type</b>                            |               |      |          |             |      |          |
| Public Facility                                               | -             | -    | -        | 533/570     | 93.5 |          |
| Private or NGO-run Facility                                   | -             | -    | -        | 133/142     | 93.7 |          |
| Hospital                                                      | -             | -    | -        | 297/318     | 93.4 |          |
| Missing                                                       | -             | -    | -        | 39/46       | 84.7 | 0.190    |

§ defined as viral load <400 copies/mL

‡ Chi-square p-values

**Supplemental Table 2: Regional & sub-county differences in distance to nearest ART facility and distance traveled for ART**

|                   | N    | Distance to nearest ART facility<br>(km) | Distance traveled to ART facility (km) | P-value <sup>□</sup> | Number of ART<br>facilities |
|-------------------|------|------------------------------------------|----------------------------------------|----------------------|-----------------------------|
|                   |      | Median (IQR)                             | Median (IQR)                           |                      |                             |
| <b>Overall</b>    | 1030 | 3.10 (1.65-5.05)                         | 5.26 (3.00-10.03)                      | <0.001               | 29                          |
| <b>Sub-County</b> |      |                                          |                                        |                      |                             |
| <b>Byakabanda</b> | 48   | 3.05 (2.56-3.40)                         | 4.74 (3.39-7.33)                       | <0.001               | 4                           |
| <b>Kabira</b>     | 60   | 5.12 (3.08-8.13)                         | 6.12 (3.16-8.20)                       | 0.161                | 9                           |
| <b>Kakuuto</b>    | 148  | 6.45 (0.89-7.01)                         | 10.97 (6.14-16.42)                     | <0.001               | 12                          |
| <b>Kalisizo</b>   | 84   | 3.70 (1.97-5.13)                         | 4.31 (2.02-5.28)                       | 0.151                | 9                           |
| <b>Kasaali</b>    | 53   | 2.06 (0.46-2.98)                         | 3.92 (0.92-11.36)                      | <0.001               | 11                          |
| <b>Kasasa</b>     | 126  | 4.84 (2.65-6.76)                         | 7.35 (4.02-13.71)                      | <0.001               | 14                          |
| <b>Kibanda</b>    | 28   | 5.95 (4.73-6.72)                         | 8.77 (5.95-13.52)                      | <0.001               | 5                           |
| <b>Kitumba</b>    | 107  | 1.41 (0.41-2.53)                         | 4.64 (1.94-7.57)                       | <0.001               | 7                           |
| <b>Kyotera Tc</b> | 109  | 1.47 (1.31-2.03)                         | 2.76 (2.23-15.01)                      | <0.001               | 15                          |
| <b>Lwanda</b>     | 183  | 4.62 (3.55-5.05)                         | 5.05 (4.10-8.39)                       | <0.001               | 10                          |
| <b>Lwankoni</b>   | 84   | 2.49 (2.20-2.84)                         | 4.39 (3.14-8.22)                       | <0.001               | 4                           |

<sup>□</sup> Wilcoxon-rank p-values comparing distance traveled and distance to nearest facility

**Supplemental Table 3: Proportions and Prevalence risk ratios (PRR) of attending nearest ART facility**

|                                                                      | n/N     | %    | Univariate |             |         | Adjusted |             |         |
|----------------------------------------------------------------------|---------|------|------------|-------------|---------|----------|-------------|---------|
|                                                                      |         |      | PRR        | 95% CI      | P-value | adjPRR§  | 95% CI      | P-value |
| <b>Female</b>                                                        | 438/742 | 59.0 | 1.00       |             |         | 1.00     |             |         |
| <b>Male</b>                                                          | 151/288 | 52.4 | 0.89       | (0.74-1.07) | 0.209   | 0.88     | (0.73-1.06) | 0.195   |
| <b>Age, Yrs.</b>                                                     |         |      |            |             |         |          |             |         |
| <b>15-24</b>                                                         | 48/96   | 50.0 | 0.85       | (0.62-1.14) | 0.297   | 0.83     | (0.60-1.12) | 0.236   |
| <b>25-29</b>                                                         | 88/148  | 59.5 | 1.01       | (0.79-1.28) | 0.945   | 0.99     | (0.77-1.26) | 0.962   |
| <b>30-39</b>                                                         | 247/419 | 58.9 | 1.00       |             |         | 1.00     |             |         |
| <b>40+</b>                                                           | 206/367 | 56.1 | 0.95       | (0.79-1.15) | 0.604   | 0.96     | (0.80-1.15) | 0.659   |
| <b>Marital status</b>                                                |         |      |            |             |         |          |             |         |
| <b>Married</b>                                                       | 305/573 | 53.2 | 1.00       |             |         | 1.00     |             |         |
| <b>Previously Married</b>                                            | 224/364 | 61.5 | 1.16       | (0.97-1.37) | 0.099   | 1.13     | (0.95-1.35) | 0.175   |
| <b>Never Married</b>                                                 | 60/93   | 64.5 | 1.21       | (0.91-1.59) | 0.173   | 1.20     | (0.90-1.59) | 0.199   |
| <b>Occupation</b>                                                    |         |      |            |             |         |          |             |         |
| <b>Non-high risk occupation</b>                                      | 539/935 | 57.6 | 1.00       |             |         | 1.00     |             |         |
| <b>Bar/waitress/sex worker/Truck or motorcycle driver/Fisherfolk</b> | 46/86   | 53.5 | 0.93       | (0.68-1.24) | 0.626   | 0.92     | (0.67-1.23) | 0.594   |
| <b>Distance from household to nearest ART facility (km)</b>          | 46/83   | 55.4 | 1.00       |             |         | 1.00     |             |         |
| <b>&lt;0.5</b>                                                       | 139/215 | 64.7 | 1.17       | (0.84-1.64) | 0.365   | 1.18     | (0.85-1.66) | 0.339   |
| <b>0.5-2</b>                                                         | 254/457 | 55.6 | 1.00       | (0.74-1.39) | 0.986   | 1.02     | (0.75-1.41) | 0.925   |
| <b>2-5</b>                                                           | 150/275 | 54.5 | 0.98       | (0.71-1.38) | 0.925   | 0.99     | (0.72-1.39) | 0.958   |
| <b>Wealth Index</b>                                                  |         |      |            |             |         |          |             |         |
| <b>High wealth</b>                                                   | 390/637 | 61.2 | 1.00       |             |         | 1.00     |             |         |
| <b>Low wealth</b>                                                    | 198/391 | 50.6 | 0.83       | (0.70-0.98) | 0.030   | 0.83     | (0.7-0.99)  | 0.038   |
| <b>Vehicle ownership</b>                                             |         |      |            |             |         |          |             |         |
| <b>None</b>                                                          | 477/825 | 57.8 | 1.00       |             |         | 1.00     |             |         |
| <b>Car or Motorcycle</b>                                             | 112/205 | 54.6 | 0.94       | (0.77-1.16) | 0.590   | 0.96     | (0.78-1.18) | 0.720   |
| <b>Viral Load</b>                                                    |         |      |            |             |         |          |             |         |
| <b>&lt;400 copies/mL</b>                                             | 551/963 | 57.2 | 1.00       |             |         | 1.00     |             |         |
| <b>400+ copies/mL</b>                                                | 37/66   | 56.1 | 0.98       | (0.69-1.35) | 0.904   | 0.99     | (0.70-1.37) | 0.955   |
| <b>Weight loss</b>                                                   | 30/52   | 57.7 | 0.99       | (0.67-1.41) | 0.968   | 0.98     | (0.66-1.39) | 0.905   |
| <b>Prolonged diarrhea</b>                                            | 7/10    | 70.0 | 1.21       | (0.52-2.35) | 0.620   | 1.25     | (0.53-2.43) | 0.563   |
| <b>Prolonged fever</b>                                               | 21/28   | 75.0 | 1.30       | (0.82-1.96) | 0.235   | 1.28     | (0.80-1.94) | 0.263   |
| <b>Hypertension</b>                                                  | 28/54   | 51.9 | 0.89       | (0.59-1.27) | 0.534   | 0.86     | (0.57-1.24) | 0.433   |
| <b>Any symptoms of opportunistic infection</b>                       | 115/200 | 57.5 | 1.01       | (0.82-1.23) | 0.948   | 0.99     | (0.80-1.21) | 0.930   |

§Adjusted for variables identified as potential confounders (age &amp; sex)

**Supplemental Table 4:** Unadjusted and adjusted prevalence risk ratios (PRR) of traveling to access a tertiary treatment facility (Hospital/HC4), by demographic and health characteristics

|                                                               | n/N     | %    | Univariate |             |         | Adjusted§        |             |         |
|---------------------------------------------------------------|---------|------|------------|-------------|---------|------------------|-------------|---------|
|                                                               |         |      | PRR        | 95% CI      | P-Value | PRR <sup>§</sup> | 95% CI      | P-Value |
| <b>Female</b>                                                 | 170/438 | 38.8 | 1.00       |             |         | 1.00             |             |         |
| <b>Male</b>                                                   | 52/151  | 34.4 | 0.89       | (0.64-1.20) | 0.450   | 0.94             | (0.68-1.28) | 0.716   |
| <b>Age, Yrs.</b>                                              |         |      |            |             |         |                  |             |         |
| 15-24                                                         | 29/48   | 60.4 | 1.62       | (1.05-2.43) | 0.023   | 1.61             | (1.04-2.41) | 0.028   |
| 25-29                                                         | 35/88   | 39.8 | 1.07       | (0.71-1.56) | 0.741   | 1.06             | (0.71-1.55) | 0.763   |
| 30-39                                                         | 92/247  | 37.2 | 1.00       |             |         | 1.00             |             |         |
| 40+                                                           | 66/206  | 32.0 | 0.86       | (0.62-1.18) | 0.350   | 0.86             | (0.63-1.18) | 0.359   |
| <b>Marital status</b>                                         |         |      |            |             |         |                  |             |         |
| Married                                                       | 106/305 | 34.8 | 1.00       |             |         | 1.00             |             |         |
| Previously Married                                            | 89/224  | 39.7 | 1.14       | (0.86-1.51) | 0.352   | 1.19             | (0.89-1.59) | 0.247   |
| Never Married                                                 | 27/60   | 45.0 | 1.29       | (0.83-1.94) | 0.231   | 1.16             | (0.74-1.77) | 0.506   |
| <b>Occupation</b>                                             |         |      |            |             |         |                  |             |         |
| Non-high risk occupation                                      | 204/539 | 37.8 | 1.00       |             |         | 1.00             |             |         |
| Bar/waitress/sex worker/Truck or motorcycle driver/Fisherfolk | 15/46   | 32.6 | 0.86       | (0.49-1.40) | 0.578   | 0.85             | (0.48-1.39) | 0.556   |
| <b>Distance from household to nearest ART facility (km)</b>   | 14/46   | 30.4 | 1.00       |             |         | 1.00             |             |         |
| <0.5                                                          | 45/139  | 32.4 | 1.06       | (0.60-2.01) | 0.840   | 1.07             | (0.60-2.02) | 0.827   |
| 0.5-2                                                         | 107/254 | 42.1 | 1.38       | (0.82-2.53) | 0.253   | 1.37             | (0.81-2.51) | 0.265   |
| 2-5                                                           | 56/150  | 37.3 | 1.23       | (0.70-2.29) | 0.494   | 1.21             | (0.69-2.25) | 0.530   |
| <b>Wealth Index</b>                                           |         |      |            |             |         |                  |             |         |
| High wealth                                                   | 153/390 | 39.2 | 1.00       |             |         | 1.00             |             |         |
| Low wealth                                                    | 68/198  | 34.3 | 0.88       | (0.65-1.16) | 0.361   | 0.90             | (0.67-1.20) | 0.474   |
| <b>Vehicle ownership</b>                                      |         |      |            |             |         |                  |             |         |
| None                                                          | 186/477 | 39.0 | 1.00       |             |         | 1.00             |             |         |
| Car or Motorcycle                                             | 36/112  | 32.1 | 0.82       | (0.57-1.16) | 0.289   | 0.83             | (0.57-1.17) | 0.305   |
| <b>Viral Load</b>                                             |         |      |            |             |         |                  |             |         |
| <400 copies/mL                                                | 203/551 | 36.8 | 1.00       |             |         | 1.00             |             |         |
| 400+ copies/mL                                                | 18/37   | 48.6 | 1.32       | (0.79-2.08) | 0.258   | 1.25             | (0.74-1.97) | 0.377   |
| <b>Weight loss</b>                                            | 13/30   | 43.3 | 1.24       | (0.67-2.09) | 0.457   | 1.23             | (0.66-2.08) | 0.476   |
| <b>Prolonged diarrhea</b>                                     | 5/7     | 71.4 | 2.04       | (0.73-4.46) | 0.115   | 2.01             | (0.71-4.41) | 0.124   |
| <b>Prolonged fever</b>                                        | 14/21   | 66.7 | 1.95       | (1.08-3.24) | 0.016   | 1.87             | (1.04-3.12) | 0.024   |
| <b>Hypertension</b>                                           | 15/28   | 53.6 | 1.56       | (0.88-2.55) | 0.101   | 1.76             | (0.98-2.92) | 0.042   |
| <b>Any symptoms of opportunistic infection</b>                | 51/115  | 44.3 | 1.23       | (0.89-1.67) | 0.196   | 1.28             | (0.92-1.75) | 0.127   |

§Adjusted for variables identified as potential confounders (age &amp; sex)
